# Supplementary material for: SLAMF7 Regulates Inflammatory Response In Macrophage During Polymicrobial Sepsis
Source: Research Square preprint supplement (doi:10.21203/rs.3.rs-214049/v1), 2021-02-19
Supplement: Supplementary file 1 [file d95d59198a2515e36dabe047.pdf]

## Supplementary Data

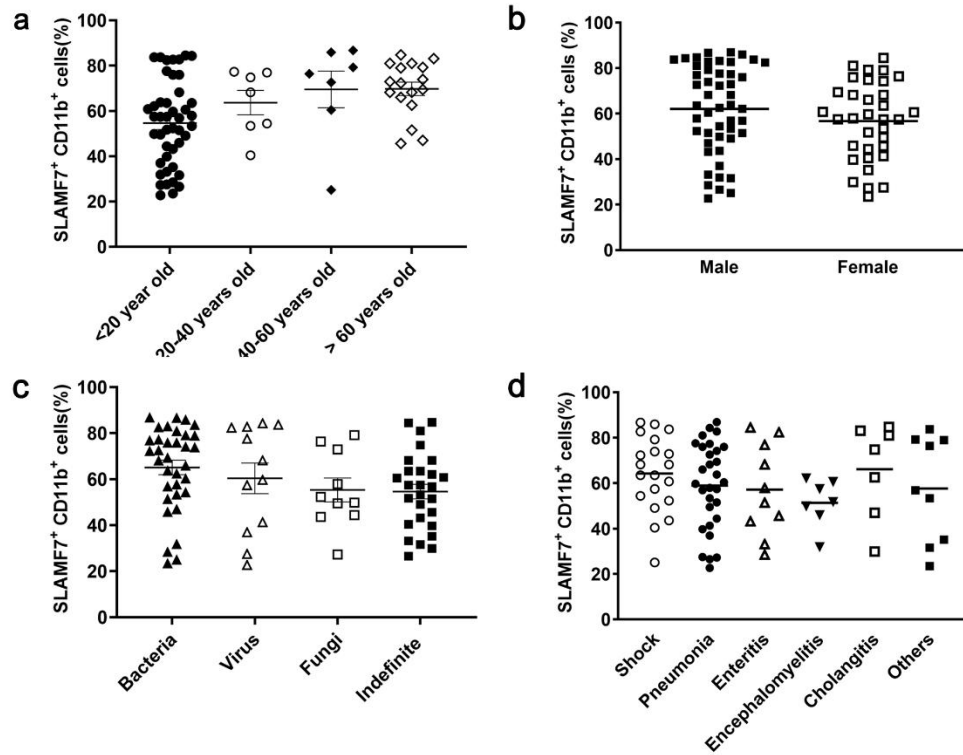

**Supplementary Figure 1**

**SLAMF7 expression is not related to clinical parameters.**

Percentage of SLAMF7<sup>+</sup> CD11b<sup>+</sup> cells in PBMC from sepsis patients were divided by (a) gender, (b) age, (c) infectious microbes or (d) diagnosis.

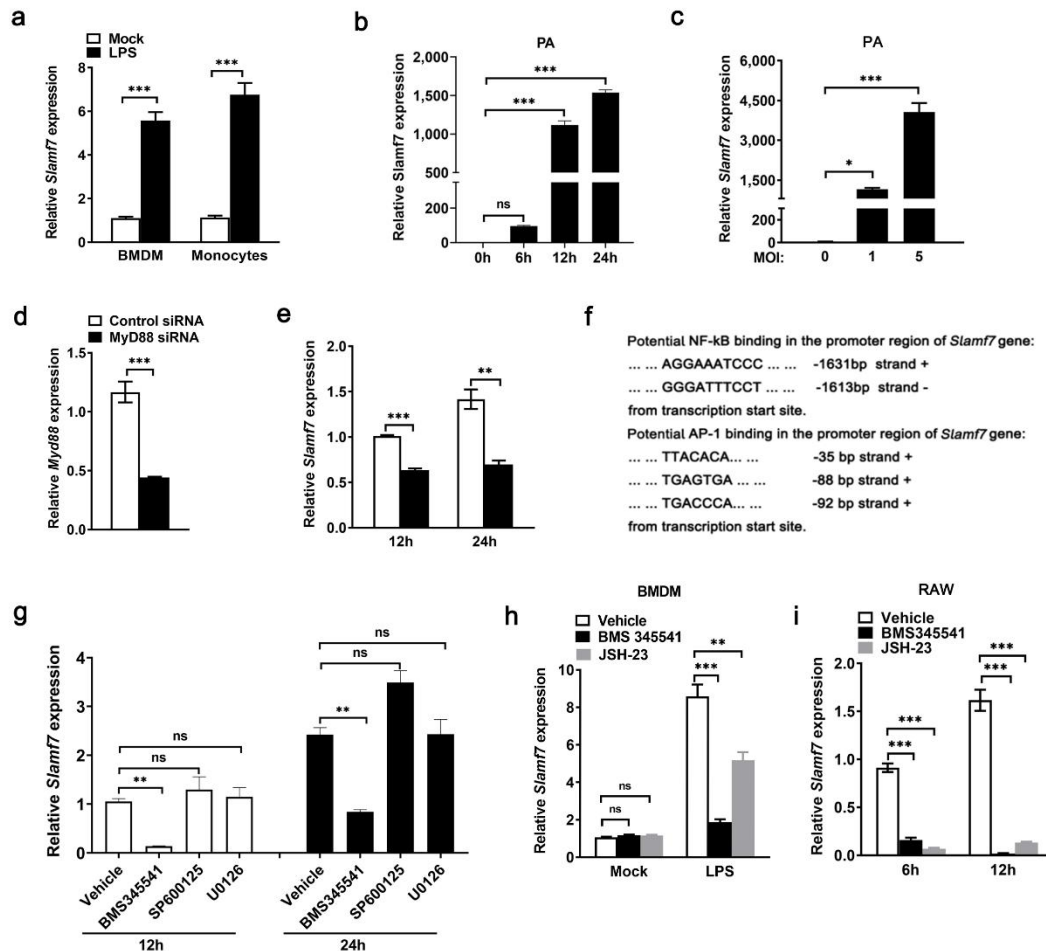

## Supplementary Figure 2

### TLR/NF-κB signaling induces SLAMF7 expression in macrophages.

**a**, mRNA levels of *Slamf7* in mouse bone marrow derived macrophages (BMDM) or human monocytes isolated from peripheral blood (monocytes) were examined after LPS stimulation for 24 h. **b,c**, mRNA levels of *Slamf7* were examined in RAW264.7 cells after PA infection (MOI=1) at indicated time points (**b**) or indicated concentrations at 24h post PA stimulation (**c**). **d,e**, BMDM were transiently transfected with MyD88 specific or control siRNA for 24h, followed by LPS stimulation for 24 h. mRNA levels of *Myd88* (**d**) and *Slamf7* (**e**) were examined by real-time PCR. **f**, The potential binding sites for transcription factors including NF-κB (-1631bp from the transcription start site) and AP-1 (-35bp, -88bp and -92bp from the transcription start site) were analyzed in the promoter region of *Slamf7* by JASPAR software. **g**, *Slamf7* expression was examined in RAW264.7 cells pre-treated with inhibitors

targeting IKK $\alpha/\beta$  (BMS345541), JNK (SP600125) or p38 (U0126) for 1 h, followed by LPS challenge for 24 h. **h,i**, *Slamf7* expression in BMDM (**h**) or RAW264.7 cells (**i**) after pretreatment with NF- $\kappa$ B signaling inhibitors (BMS345541 for IKK $\alpha/\beta$  and JSH-23 for NF- $\kappa$ B) and LPS stimulation. Data are the mean  $\pm$  SEM and represent three individual experiments. ns, not significant; \*,  $P < 0.05$ ; \*\*,  $P < 0.01$ ; \*\*\*,  $P < 0.001$ .

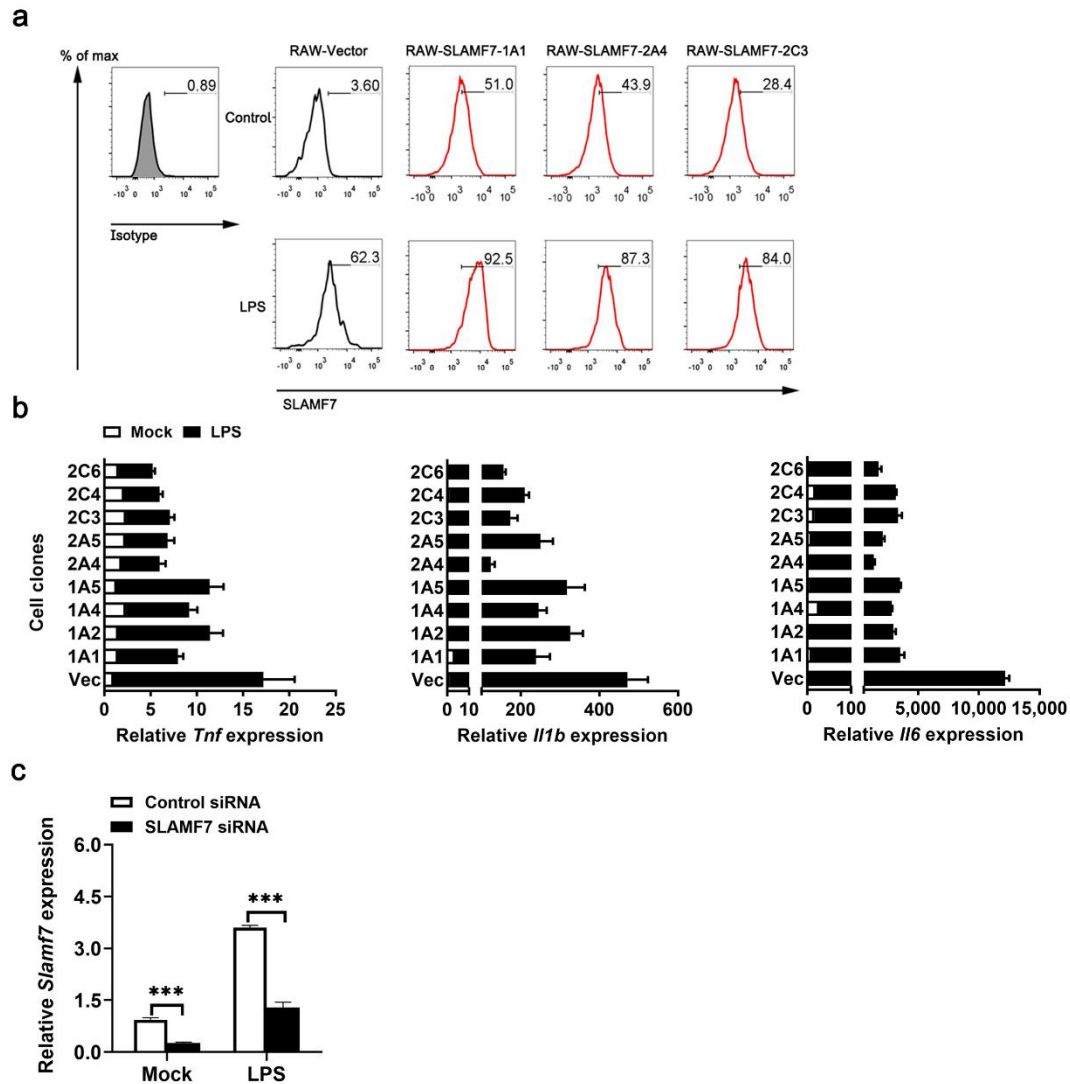

**Supplementary Figure 3. SLAMF7 negatively regulates inflammatory cytokines production *in vitro*.** **a**, SLAMF7 expression in RAW-Vector cells and multiple RAW-SLAMF7 overexpressing cell clones before and after LPS stimulation for 24 h. **b**, RAW264.7 cells stably expressing SLAMF7 (RAW-SLAMF7) and control vector (RAW-Vector) cells were constructed. mRNA levels of inflammatory cytokines in different RAW-SLAMF7 cell clones vs RAW-Vector cells were analyzed. **c**, The expression of *Slamf7* in BMDM transfected with SLAMF7 siRNA or Control siRNA, followed by LPS stimulation for 24 h. Data are the mean  $\pm$  SEM and represent three individual experiments. \*\*\*,  $P < 0.001$ .

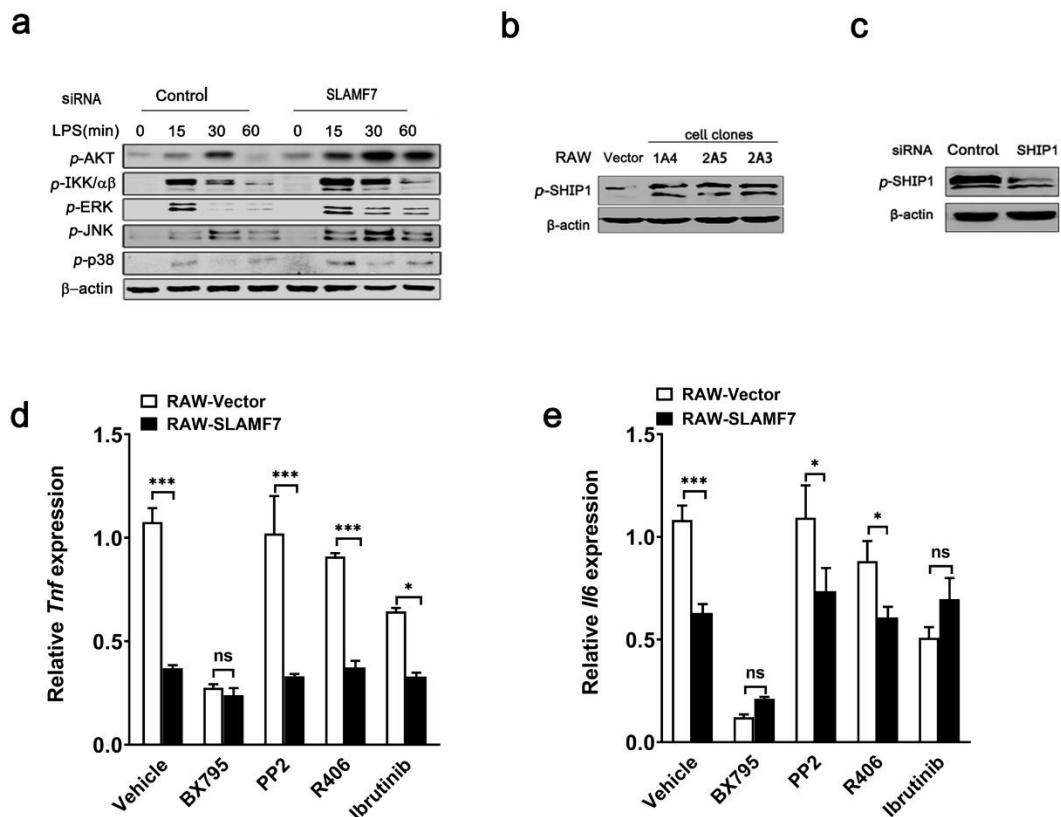

**Supplementary Figure 4. SLAMF7 inhibits MAPKs/NF-kB signaling pathways requiring TBK1 kinases. a,** Immunoblot analysis of

phosphorylated signaling molecules in MAPKs and AKT signaling pathways of BMDM transfected with SLAMF7 siRNA and Control siRNA after stimulating for 0min,15min,30min,60 min. **b, c,** Phosphorylation of SHIP1 in RAW-SLAMF7 cell clones compared to RAW-Vector (**b**) or after transfected with siRNA targeting SHIP1 (**c**). **d, e,** The expression of *Tnf* (**d**) and *Il6* (**e**) of RAW264.7 cells after pre-transfected with inhibitors of TBK1 (BX795), Src (PP2), Syk (R406) and Btk (Ibrutinib), followed by LPS stimulation for 6 h. Data are the mean  $\pm$  SEM and represent three individual experiments. ns, not significant; \*,  $P < 0.05$ ; \*\*,  $P < 0.01$ ; \*\*\*,  $P < 0.001$ .

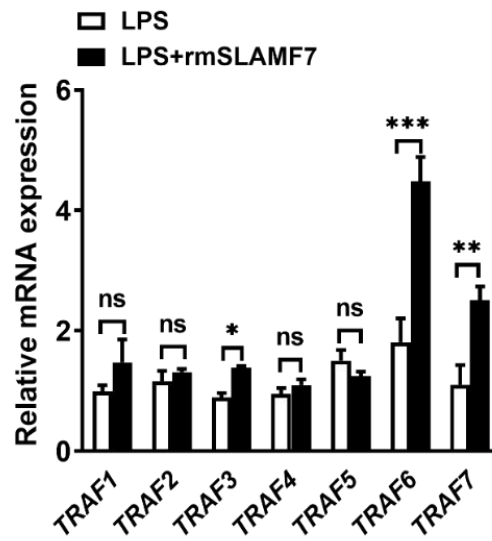

### Supplementary Figure 5.

The expression levels of *TRAF1-7* in BMDM after treatment with rmSLAMF7, followed by LPS stimulation. Data are the mean  $\pm$  SEM and represent three individual experiments. ns, not significant; \*,  $P < 0.05$ ; \*\*,  $P < 0.01$ ; \*\*\*,  $P < 0.001$ .

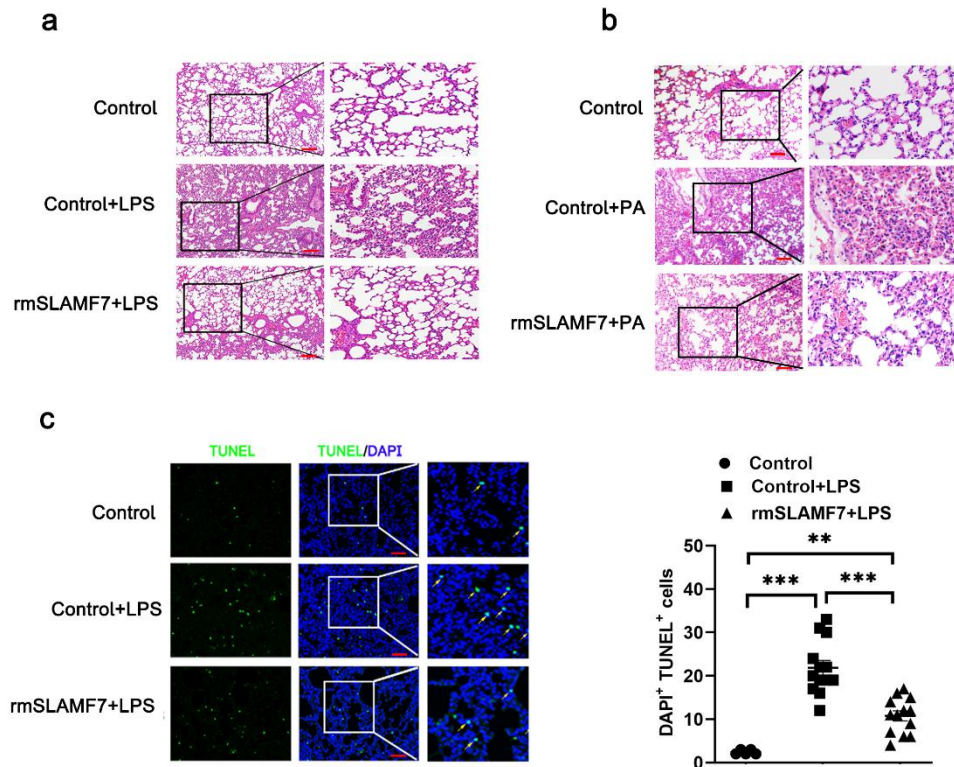

**Supplementary Figure 6. Activating SLAMF7 attenuated lung injury in septic mice.**

**a,b**, Sections from mice challenged with LPS (**a**) or PA (**b**) for 1h, followed by intraperitoneal injection of rmSLAMF7 or Control (0.9% NaCl ) for 6 h. **c**, The TUNEL and DAPI co-localization cells of lung section from endotoxin mice. White square showed the area to zoom in. Yellow arrows point the co-localization of DAPI and TUNEL. Scale bars, 20  $\mu$ m. Data are the mean  $\pm$  SEM and represent three independent experiments. \*\*,  $P < 0.01$ ; \*\*\*,  $P < 0.001$ .

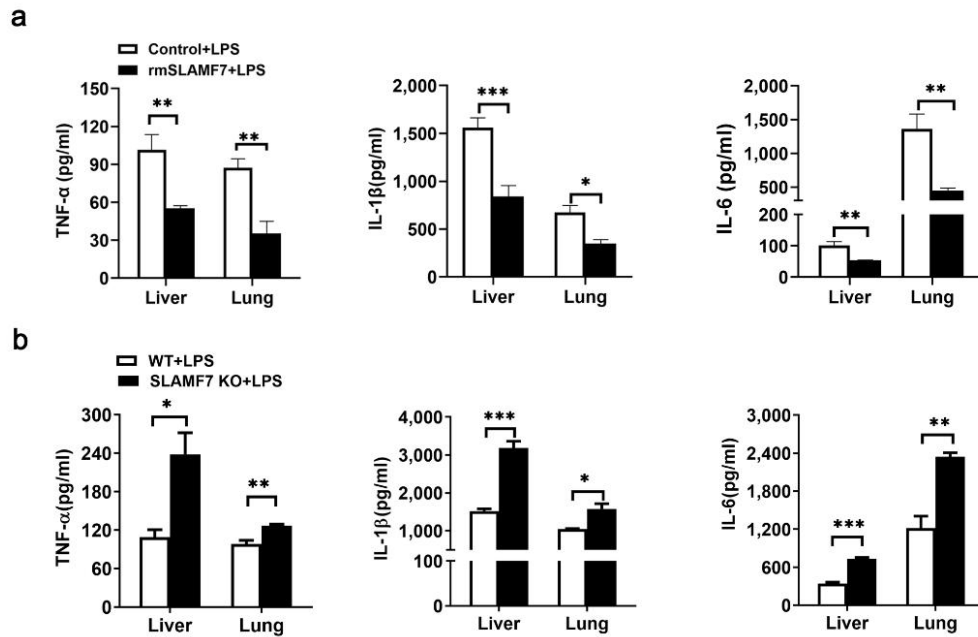

**Supplementary Figure 7. SLAMF7 negatively regulates inflammatory cytokines production *in vivo*.**

**a**, The protein levels of TNF- $\alpha$ , IL-1 $\beta$  and IL-6 in the supernatant of liver and lung from WT mice pre-challenged with LPS, followed by injection with rmSLAMF7 or vehicle control (0.9% NaCl) for 24h later. **b**, The protein levels of TNF- $\alpha$ , IL-1 $\beta$  and IL-6 in the supernatant of liver and lung from WT and SLAMF7 KO mice 24h after LPS treatment. Data are the mean  $\pm$  SEM and represent three individual experiments. \*,  $P < 0.05$ ; \*\*,  $P < 0.01$ ; \*\*\*,  $P < 0.001$ .



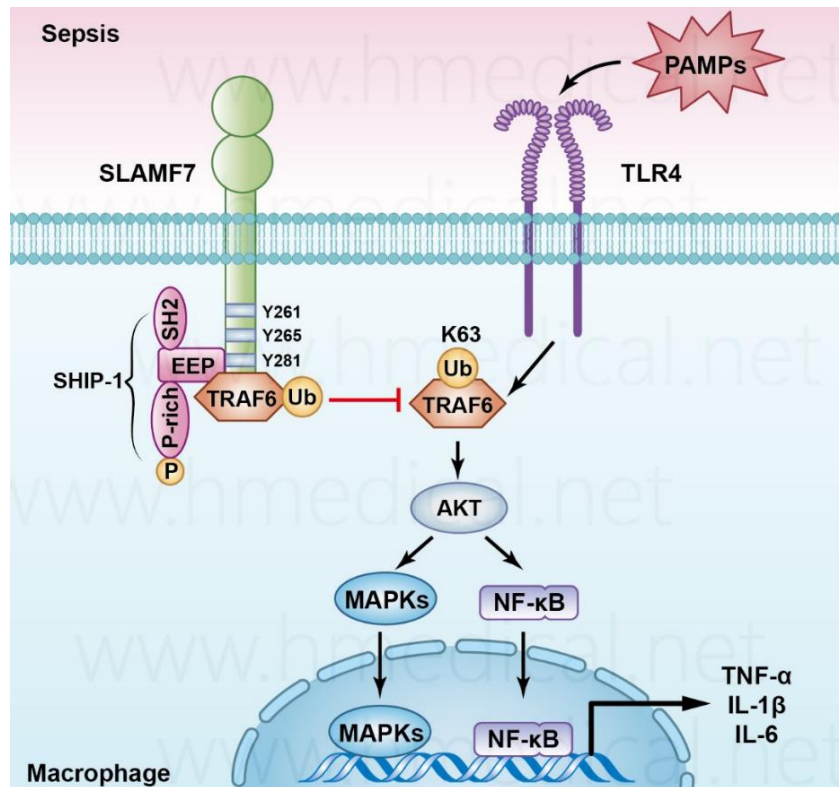

### Supplementary Figure 8 Graphical Abstract

In macrophage, Toll-Like Receptor 4 (TLR4) is activated by Pathogen-Associated Molecular Patterns (PAMPs), resulting in pro-inflammatory responses during the acute phase of sepsis. In this process, the expression of SLAMF7 is obviously upregulated. The activation of SLAMF7 negatively regulates MAPKs and NF-κB signaling pathways by inhibiting K63 ubiquitination of TRAF6 alone or co-operation with SHIP1, reducing the secretion of pro-inflammatory cytokines including TNF- $\alpha$ , IL-1 $\beta$  and IL-6.

**Supplementary Table 1. Characteristics and blood parameters of healthy donors and sepsis patients**

|                                  | Healthy control<br>subjects | Patients with<br>sepsis | <i>p</i> value* |
|----------------------------------|-----------------------------|-------------------------|-----------------|
| Sample size (no.)                | 81                          | 83                      | NA              |
| Age (years)                      | 35 (1,80)                   | 42(1, 94)               | NS              |
| Sex (M/F)                        | (40/41)                     | (49/34)                 | NS              |
| Hemoglobin (g/L)                 | 118.26±2.54                 | 90.09±2.72              | <0.0001         |
| Platelets (×10 <sup>9</sup> / L) | 312(181, 493)               | 246.23 (12,675)         | NS              |
| WBC (×10 <sup>9</sup> / L)       | 7.70 (3.7, 11.8)            | 11.71 (0.2,78.5)        | <0.0001         |
| WBC (%)                          |                             |                         |                 |
| Neutrophil (%)                   | 38 (21, 69)                 | 59.9 (6,94)             | <0.0001         |
| Monocyte (%)                     | 5.09 (3, 8)                 | 6.66 (0,22)             | NS              |
| Lymphocyte (%)                   | 53.74 (21, 72)              | 31.28 (6,81)            | <0.0001         |
| Eosinophil (%)                   | 3.04 (0, 12)                | 0.72 (0,4)              | <0.0001         |
| Basophil (%)                     | 0 .09 (0, 1)                | 0.33 (0,6)              | NS              |

F, Female; M, male; WBC: White blood cell; NA, not applicable; NS, not significant. Data were shown by mean ± SD or median (25% percentile, 75% percentile). \*The level of significance was evaluated by unpaired student *t* test or Mann-Whitney 2-tailed *U* test. *p* value <0.05 was considered statistically significant.

**Supplementary Table 2. The primers and sequences of genes used in assays of siRNA knockdown.**

| Target Gene Name | siRNA sequences     |
|------------------|---------------------|
| SLAMF7-si-001    | CCAGGAATCCAGTCAGCAA |
| SLAMF7-si-002    | CCATGAAGCTCAGCCAATT |
| SLAMF7-si-003    | GCAGAGATTTACAGTACAT |
| SHIP1-si-001     | GCAGATGAAGAACAAGCAT |
| SHIP1-si-002     | GCATATCCTGATCAGCATT |
| SHIP1-si-003     | CCAGTGGAATGAAATGCTT |

**Supplementary Table 3. The primers and sequences of genes used in quantitative PCR.**

| Gene Name              | Quantitative Primers (5'-3')                           |
|------------------------|--------------------------------------------------------|
| SLAMF7 (human)         | CGGGACCTGCACCTTGATACR-GTT<br>GCTGATAGGGTTGCTCAC        |
| $\beta$ -actin (mouse) | GATTACTGCTCTGGCTCCTAGC<br>GACTCATCGTACTCCTGCTTGC       |
| SLAMF7 (mouse)         | ACAAGAATGGCACCTGCGTA<br>AGATCCGTGGCAGCATCTTC           |
| SHIP1 (mouse)          | CCAGGGCAAGATGAGGGAGA<br>GGACCTCGGTTGGCAATGTA           |
| TNF (mouse)            | CACAGAAAGCATGATCCGCGAC<br>TGCCACAAGCAGGAATGAGAAGAG     |
| IL-6 (mouse)           | TTCCTCTCTGCAAGAGACTTCCATC<br>GCCTCCGACTTGTGAAGTGGTATAG |
| IL-1 $\beta$ (mouse)   | AGATCCGTGGCAGCATCTTC<br>CGCAGCAGCACATCAACAAGAGC        |
| IL-10 (mouse)          | AGATCCGTGGCAGCATCTTC<br>AGATCCGTGGCAGCATCTTC           |
| SAP (mouse)            | ATGCAGTGACTGTGTACCACG<br>AGGGACACTCTCGCTGTCT           |
| EAT-2 (mouse)          | CTGCCTGACCAAGCGAGAG<br>TCTGAAGATTCCGGTAGCTGTAGA        |
